# Supplementary material for: ShellChron 0.2.8: A new tool for constructing chronologies in accretionary carbonate archives from stable oxygen isotope profiles
Source: Copernicus journal article supplement (doi:10.5194/gmd-2020-401), 2021-02-12
Supplement: Supplementary file 3 [file gmd-2020-401-supplement.zip]

**A** Example of growth rate sinusoid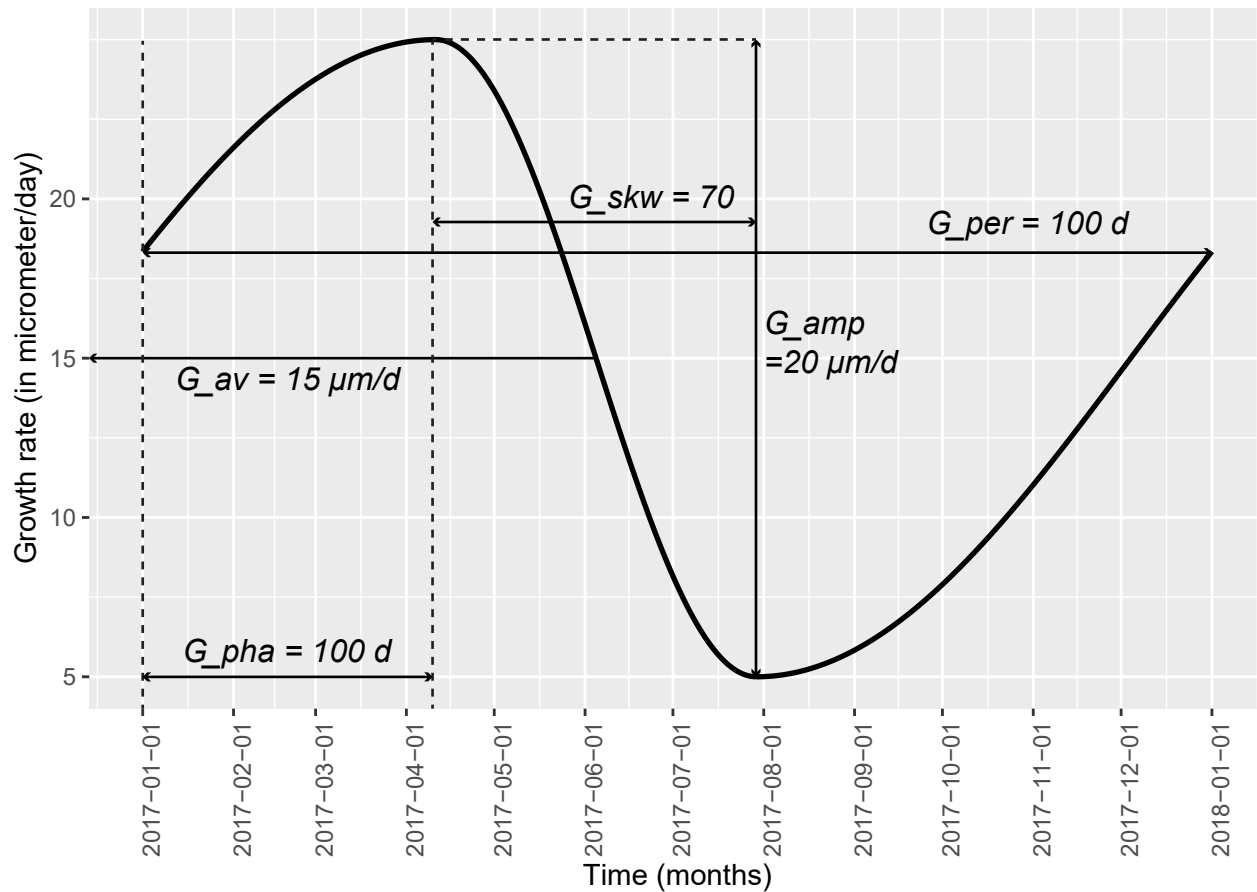**B**

| parameter                                 | value |
|-------------------------------------------|-------|
| Growth rate amplitude ( $\mu\text{m/d}$ ) | 20    |
| Growth rate period (days)                 | 365   |
| Growth rate phase (day of year)           | 100   |
| Growth rate average ( $\mu\text{m/d}$ )   | 15    |
| Growth rate skew (0 – 100)                | 70    |
