# Supplementary material for: ShellChron 0.2.8: A new tool for constructing chronologies in accretionary carbonate archives from stable oxygen isotope profiles
Source: Copernicus journal article supplement (doi:10.5194/gmd-2020-401), 2021-02-12

**Total time to run the model vs record length in years**

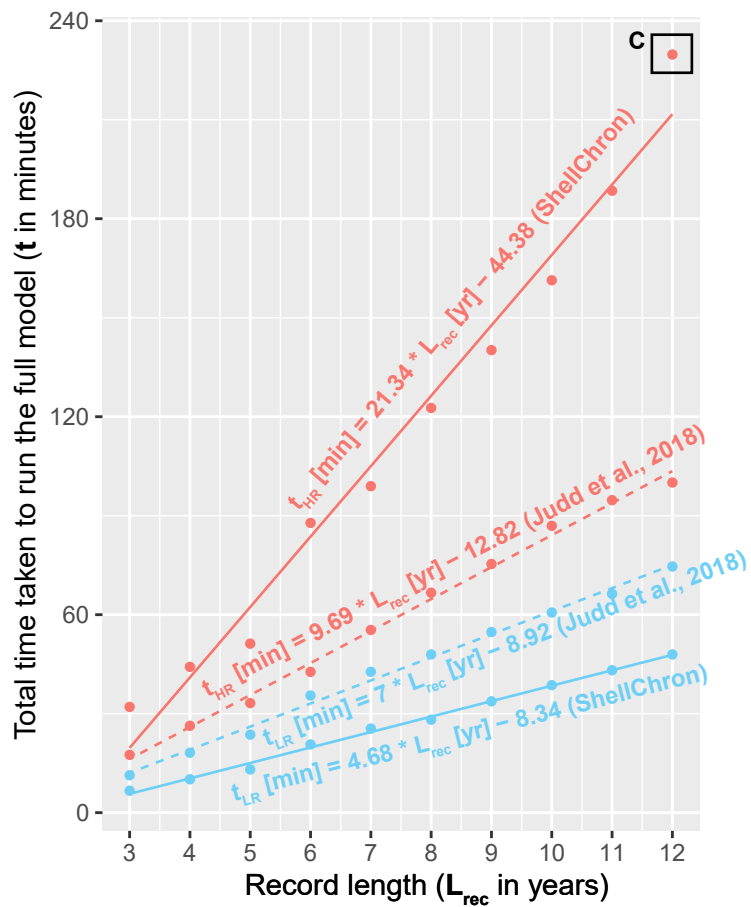

**Total time to run the model vs record length in windows**

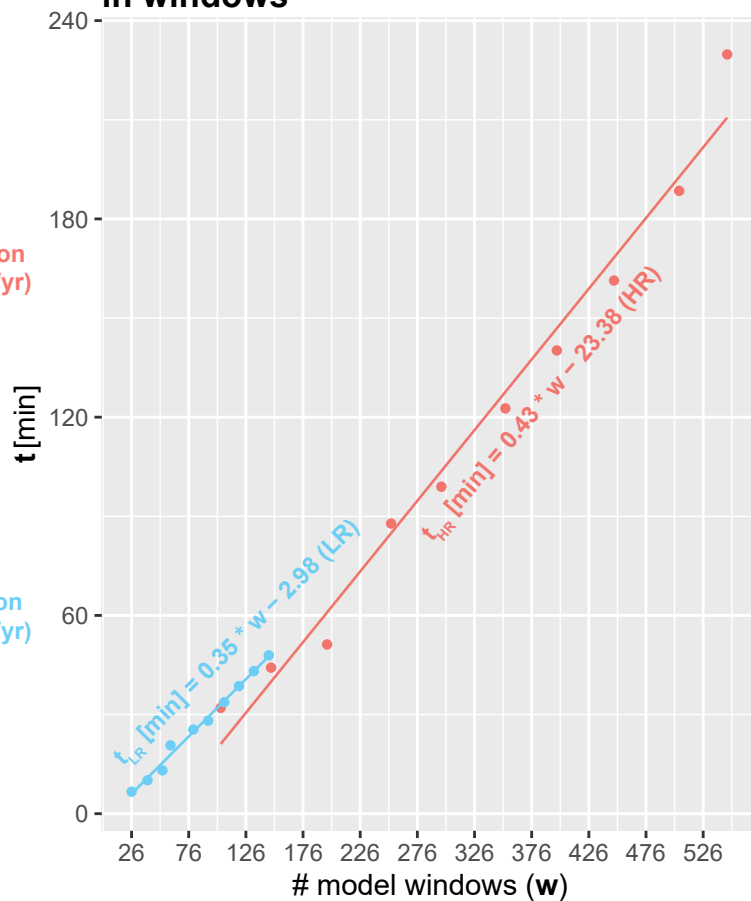

**Total time to run the model vs record length in samples**

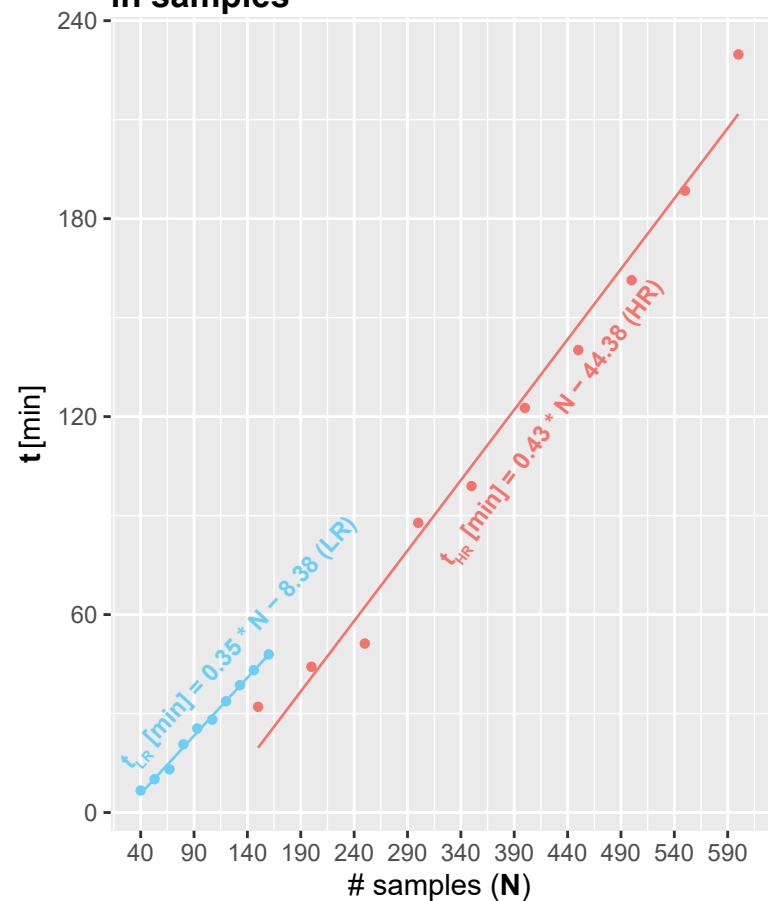

Supplement: Supplementary file 4 [file gmd-2020-401-supplement.zip]
