# Supplementary material for: ShellChron 0.2.8: A new tool for constructing chronologies in accretionary carbonate archives from stable oxygen isotope profiles
Source: Copernicus journal article supplement (doi:10.5194/gmd-2020-401), 2021-02-12
Supplement: Supplementary file 6 [file gmd-2020-401-supplement.zip]

**A** Example of temperature sinusoid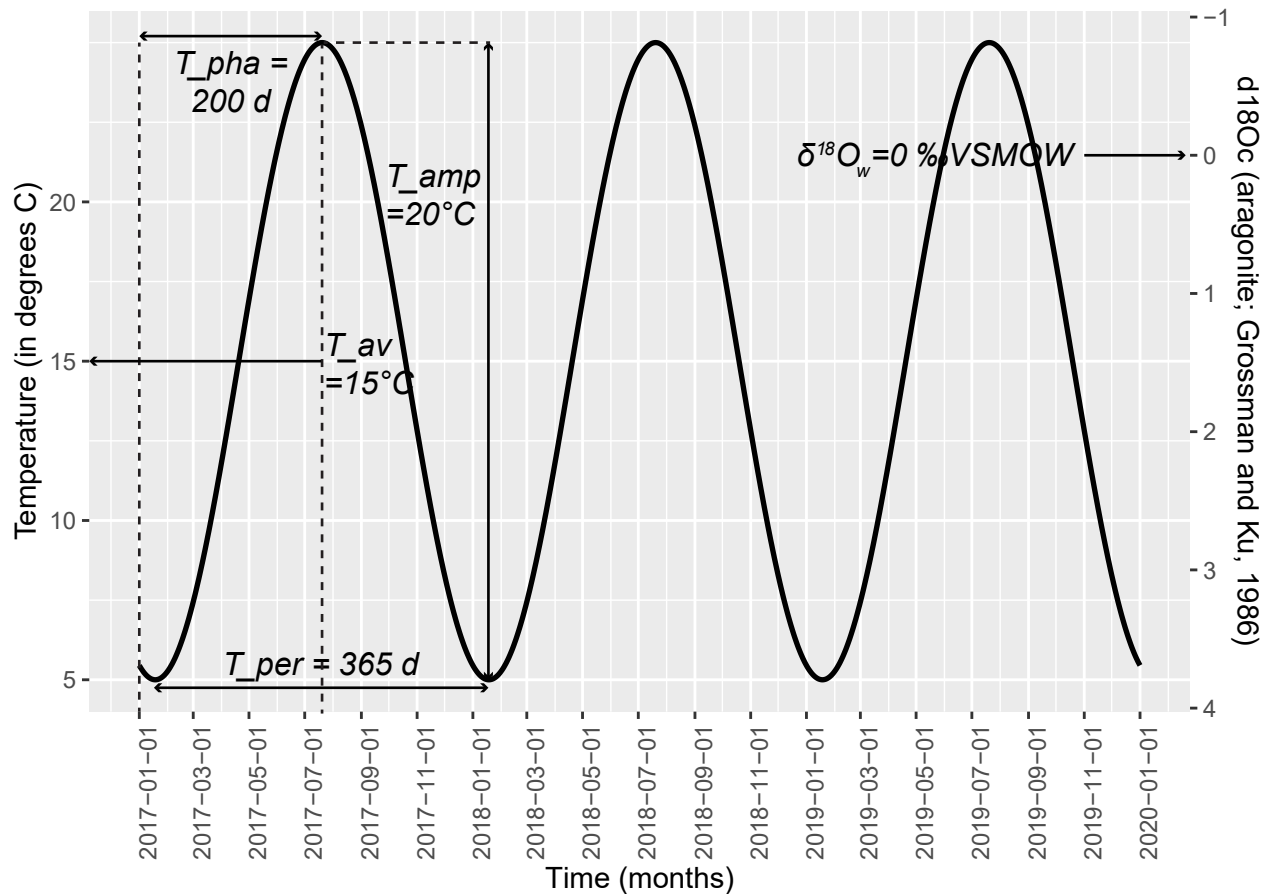**B**

| parameter                                    | value |
|----------------------------------------------|-------|
| Temperature amplitude ( $^{\circ}\text{C}$ ) | 20    |
| Temperature period (days)                    | 365   |
| Temperature phase (julian day)               | 200   |
| Temperature average ( $^{\circ}\text{C}$ )   | 15    |
| d18Ow (permille VSMOW)                       | 0     |
