# Supplementary figures and images for: ShellChron 0.2.8: A new tool for constructing chronologies in accretionary carbonate archives from stable oxygen isotope profiles
Source: Copernicus journal article supplement (doi:10.5194/gmd-2020-401), 2021-02-12

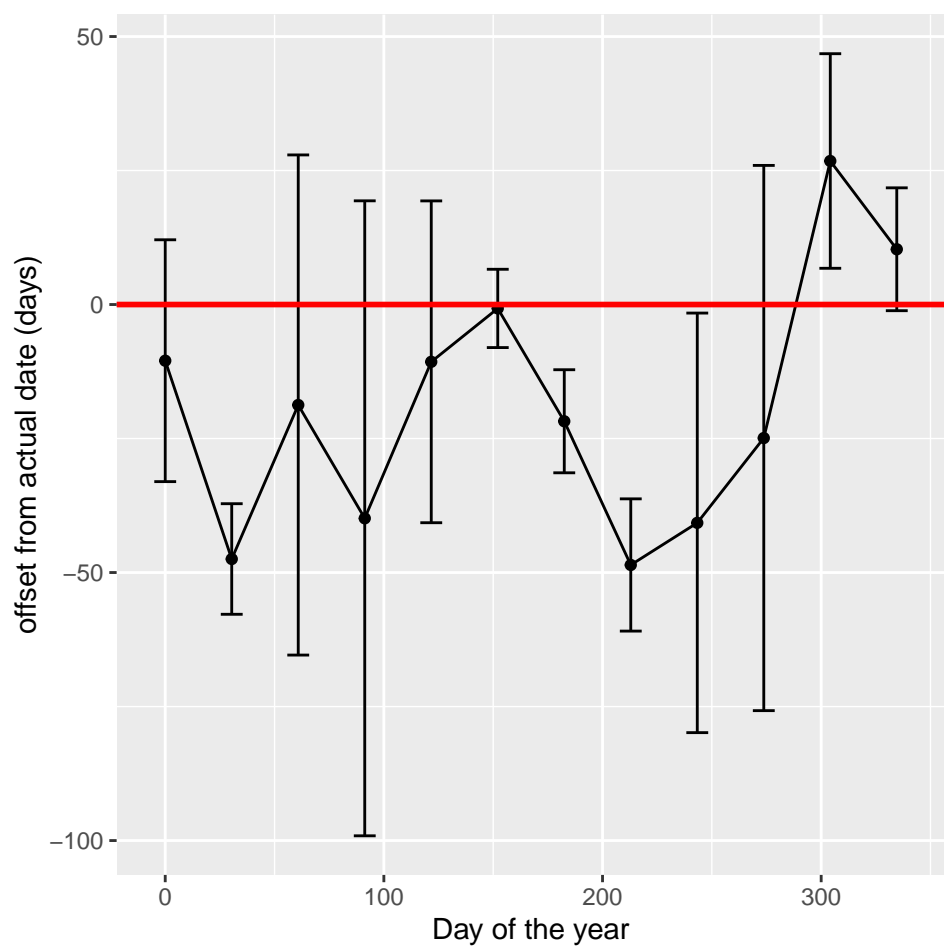

Supplement: Supplementary file 1 [file gmd-2020-401-supplement.zip]

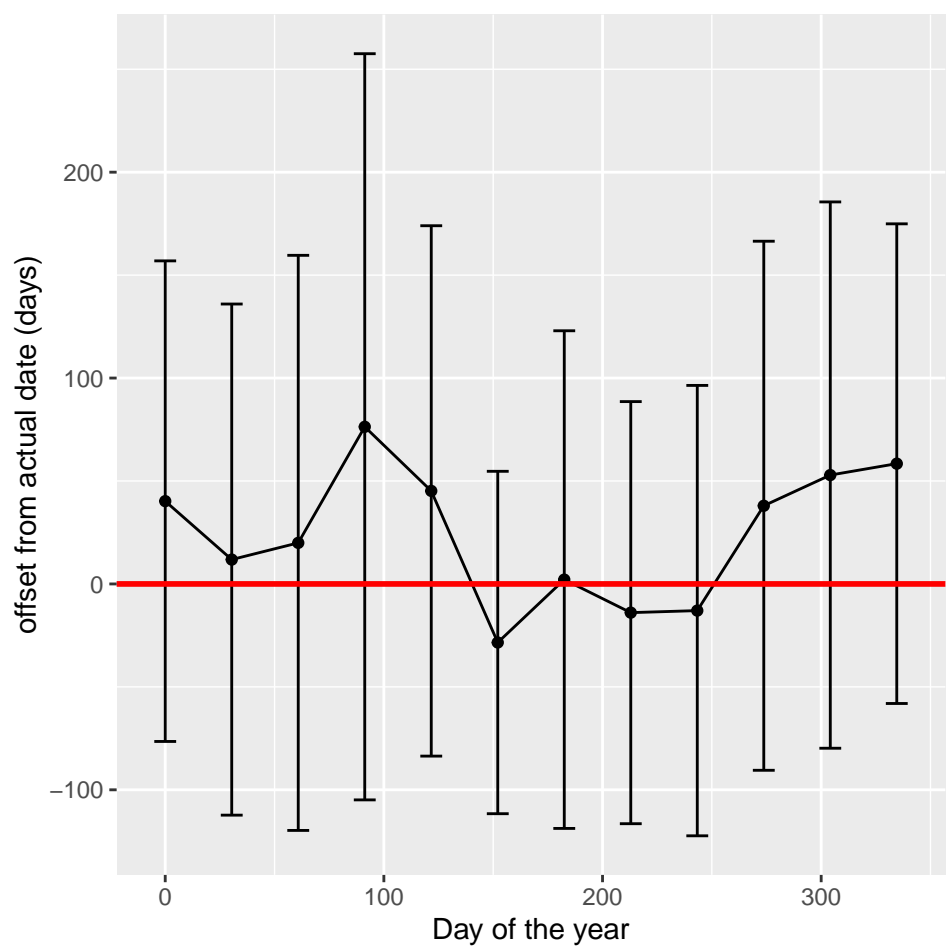

Supplement: Supplementary file 2 [file gmd-2020-401-supplement.zip]

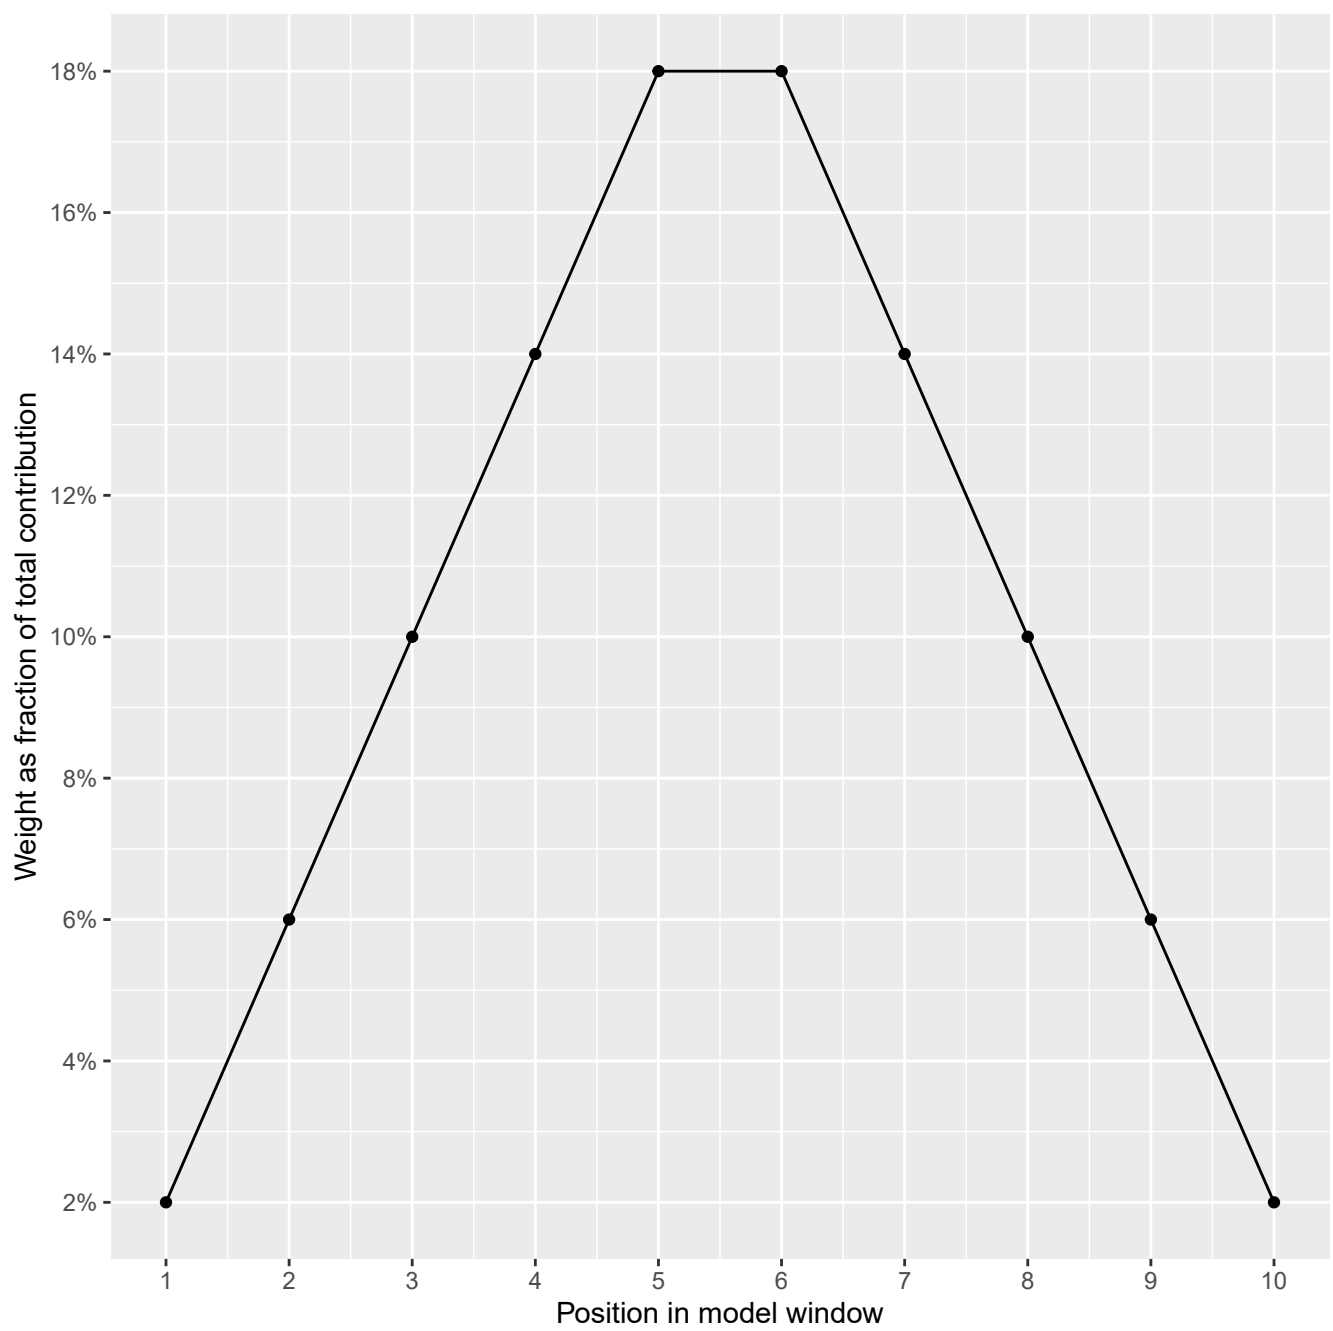

Supplement: Supplementary file 5 [file gmd-2020-401-supplement.zip]

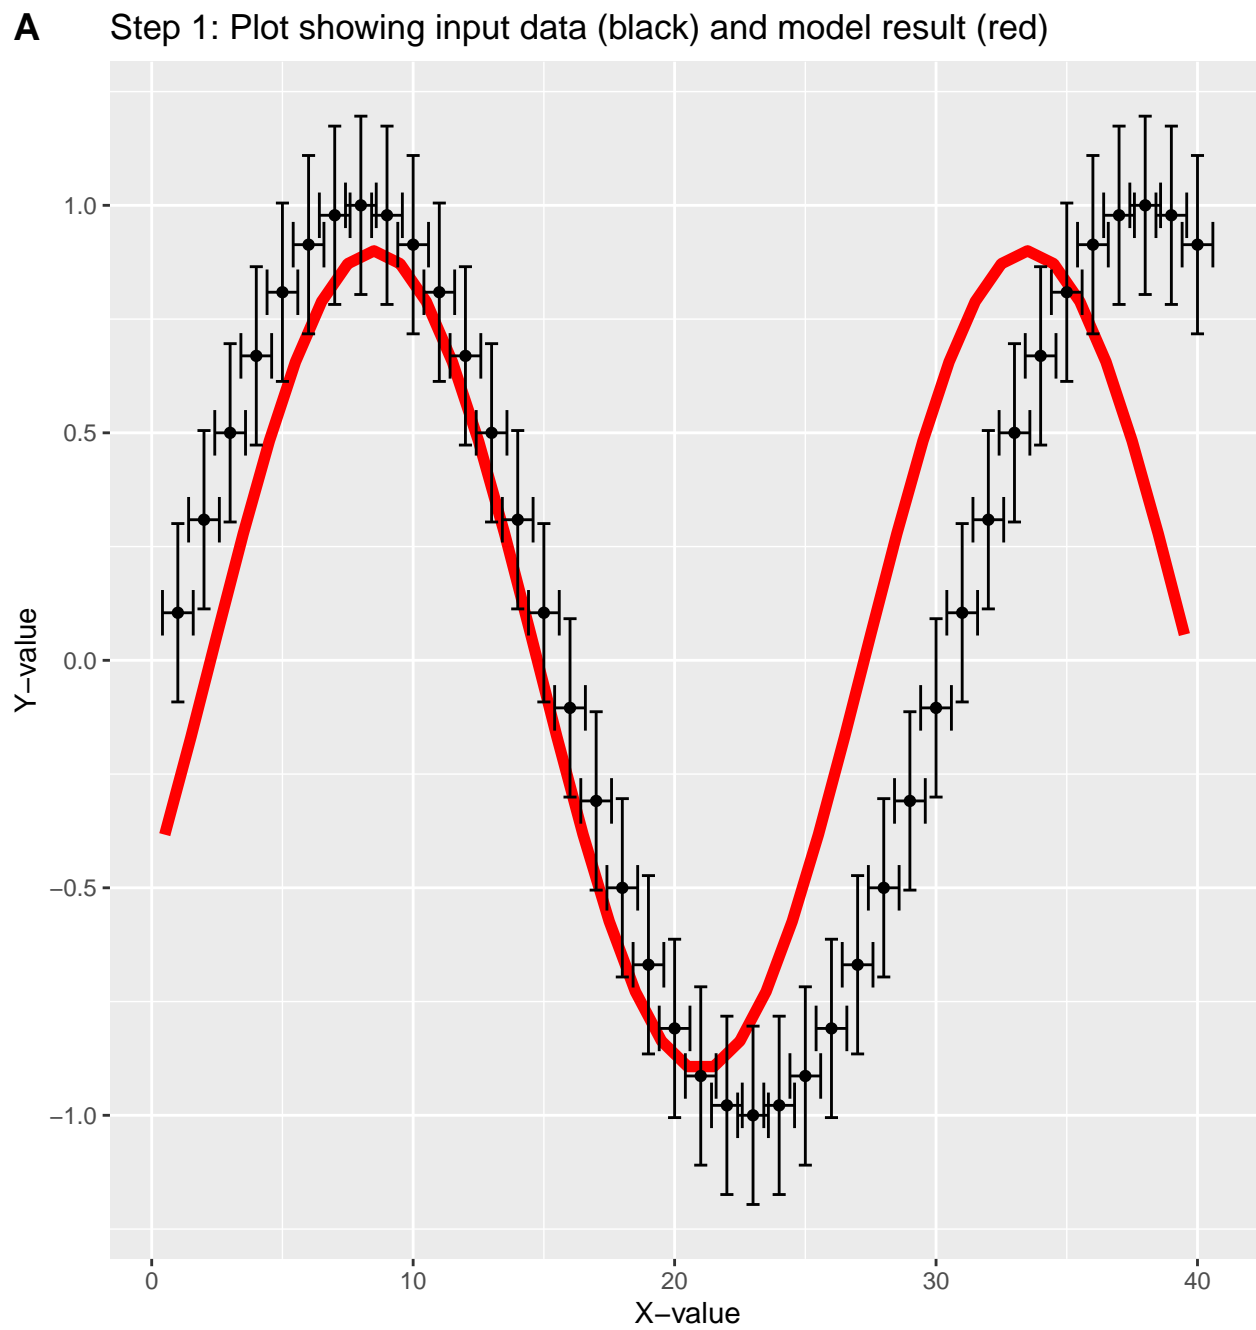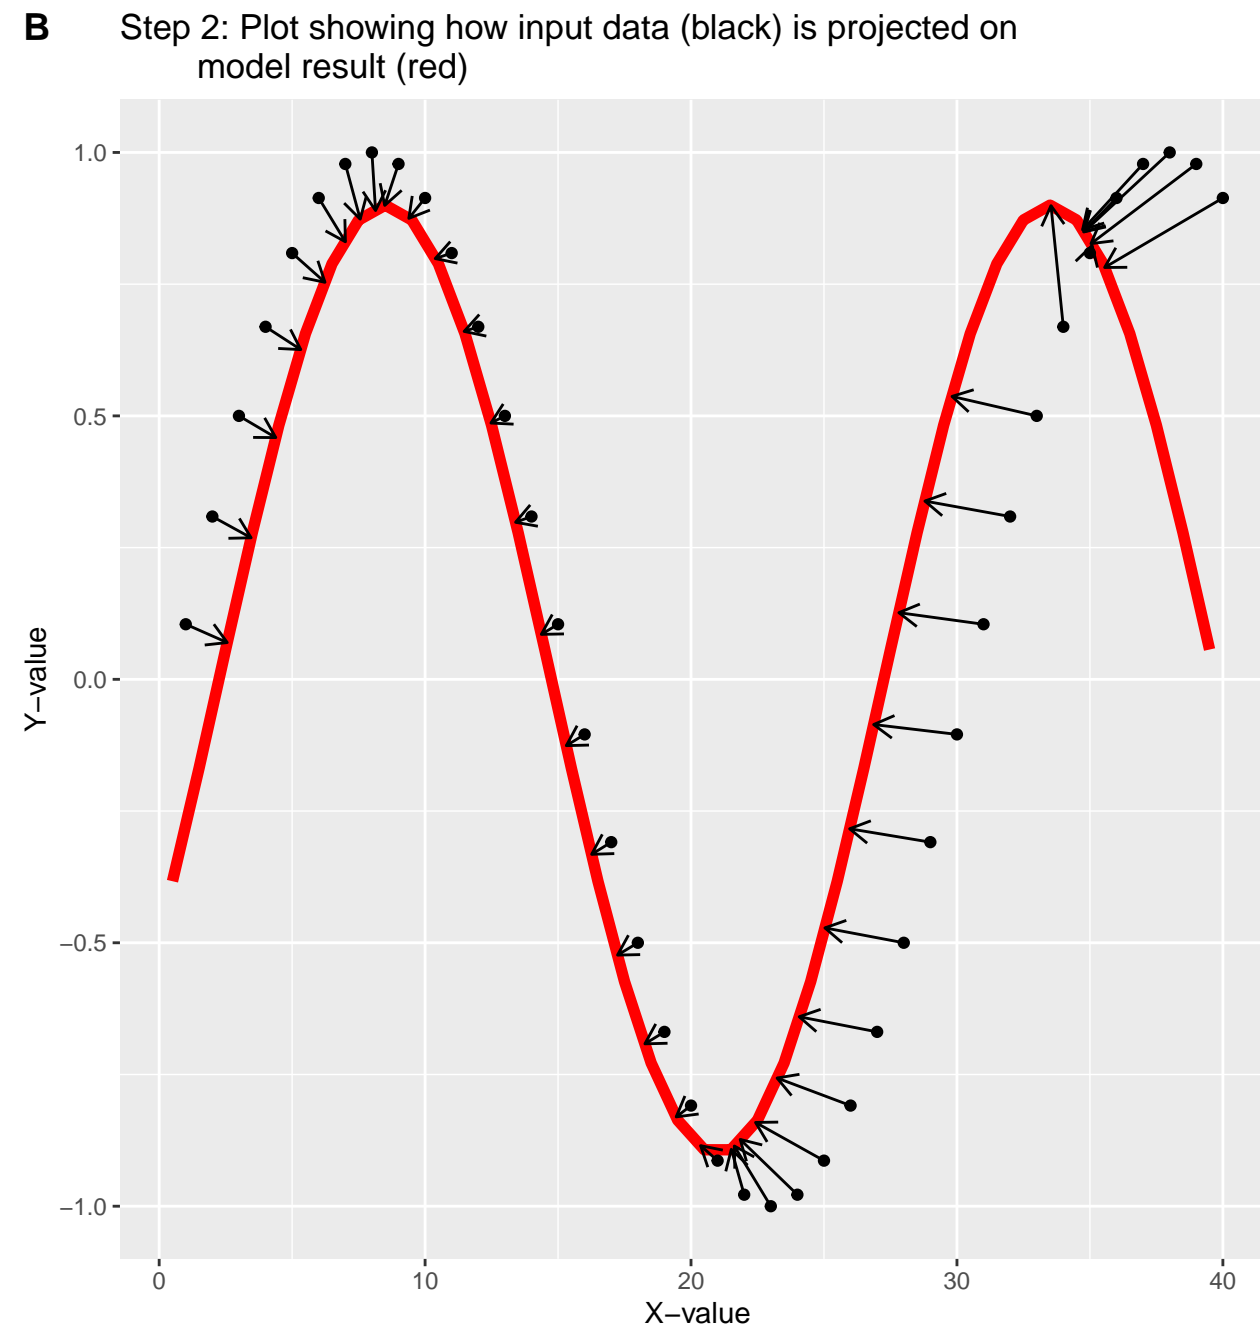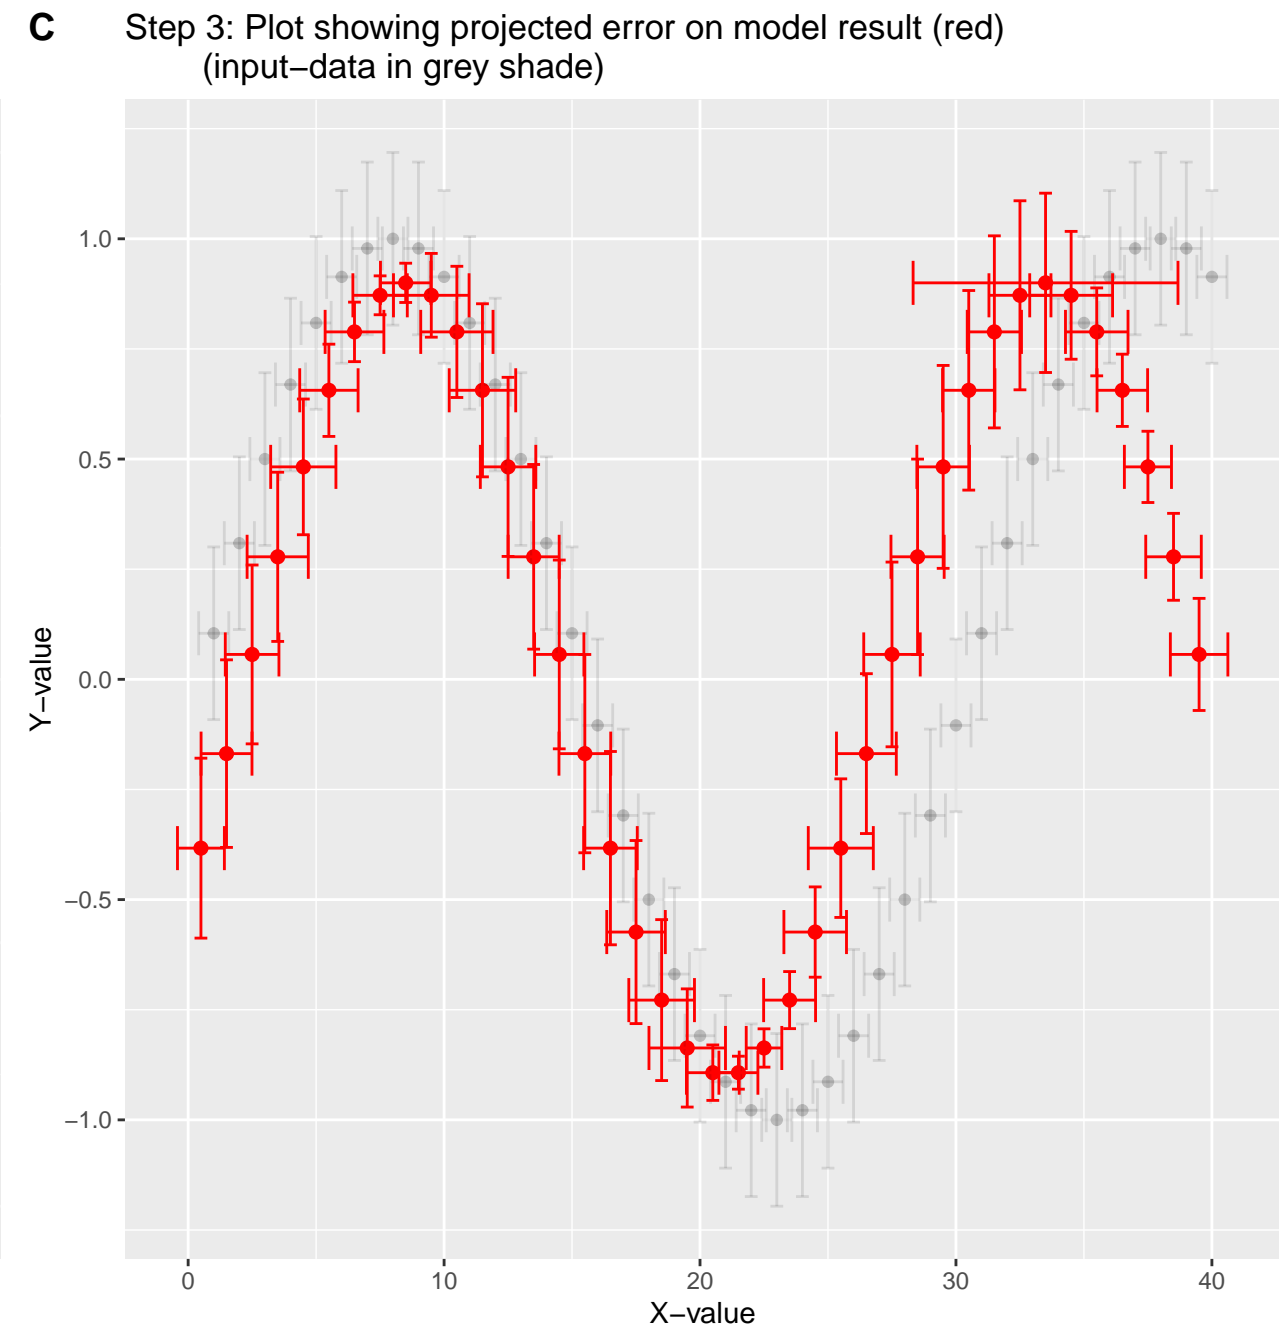

Supplement: Supplementary file 7 [file gmd-2020-401-supplement.zip]
